# Supplementary material
Source: PubMed Central journal article supplement (PMC11249285)

100K GP

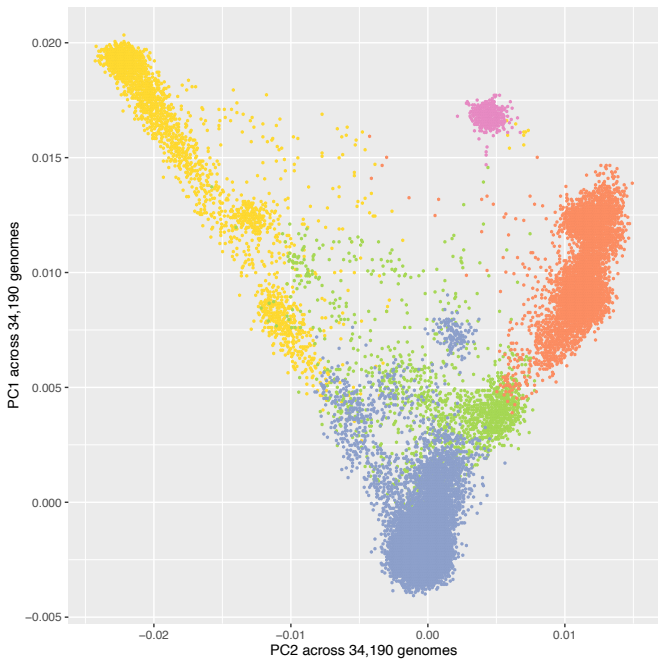

TOPMed

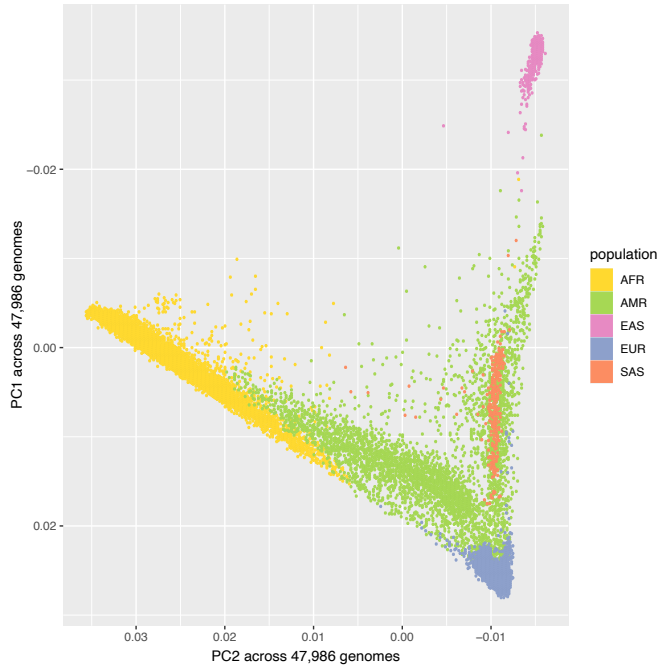

Supplement: media-3.pdf [file media-3.pdf]
