# Supplementary material
Source: PubMed Central journal article supplement (PMC11249285)

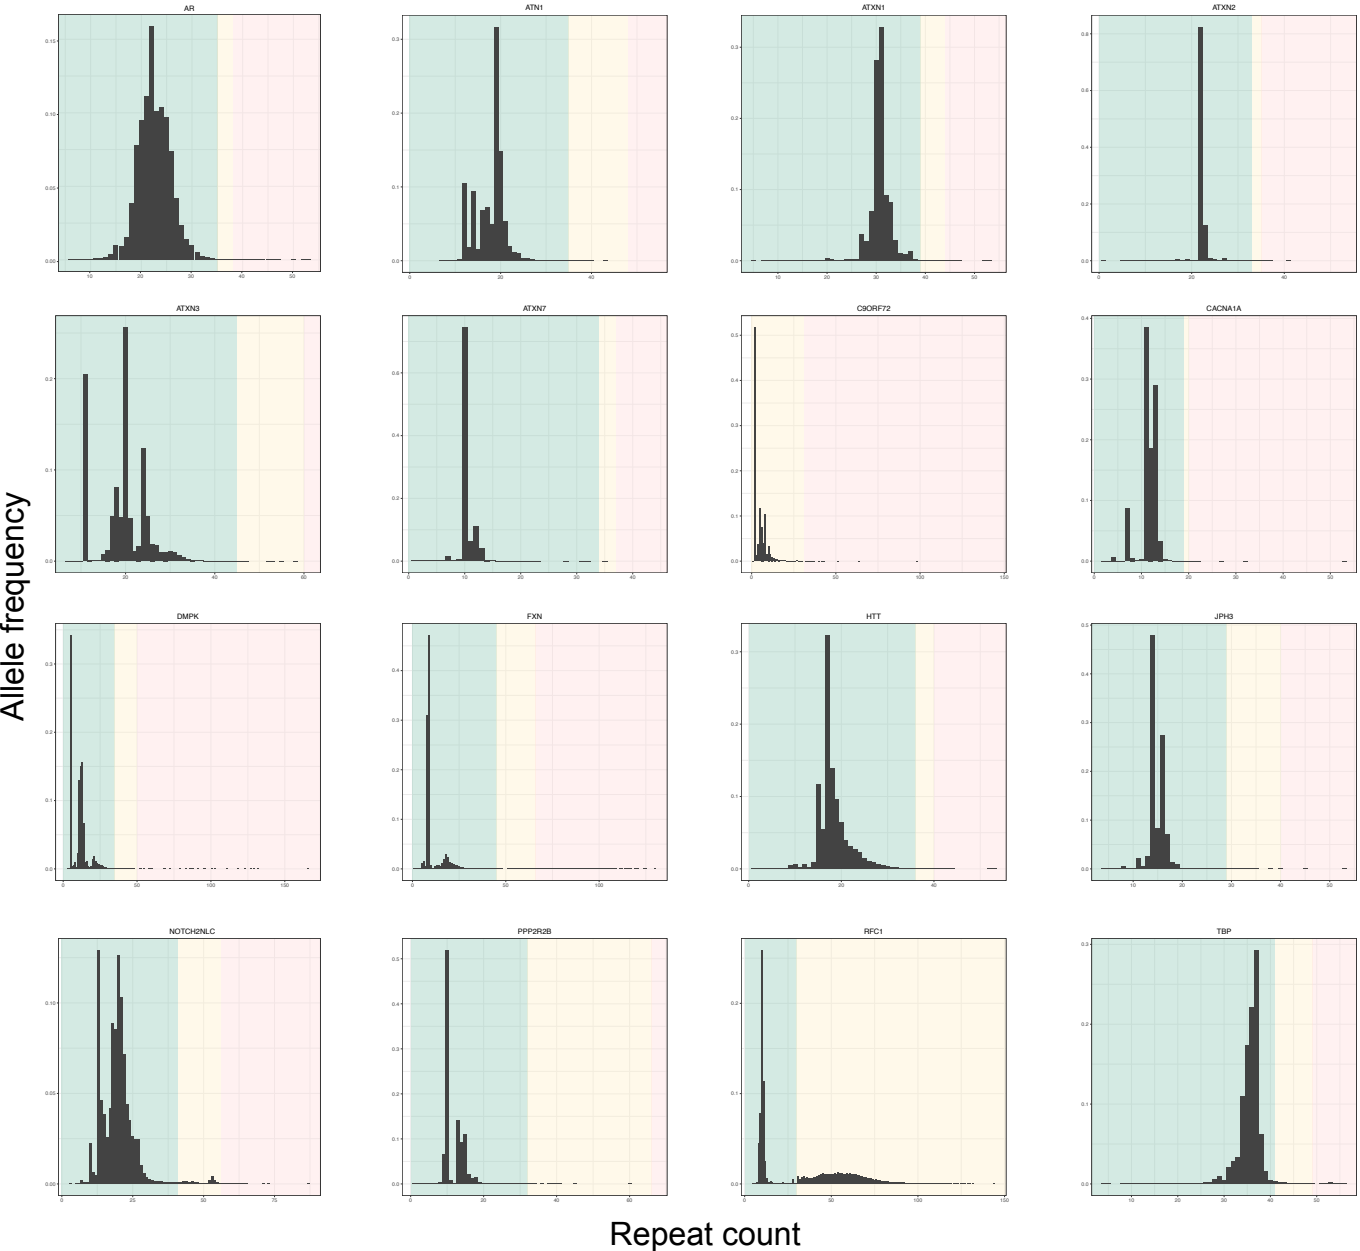

Supplement: media-5.pdf [file media-5.pdf]
