# Supplementary material
Source: PubMed Central journal article supplement (PMC11249285)
Supplement: media-7.pdf [file media-7.pdf]

ATXN3

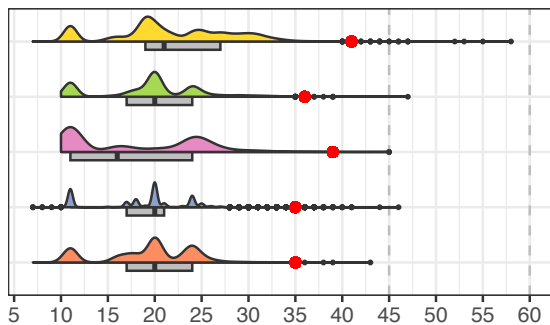

C9orf72

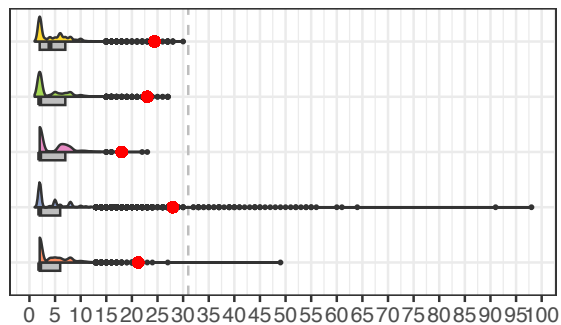

NOTCH2NL

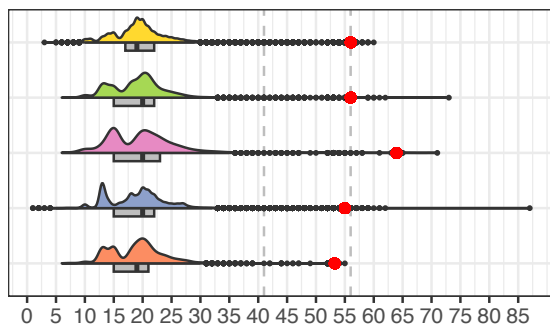

PPP2R2B

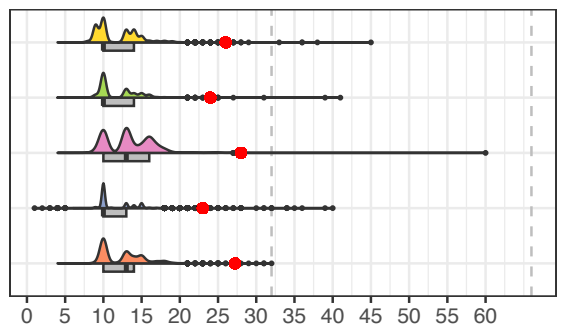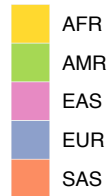

FXN

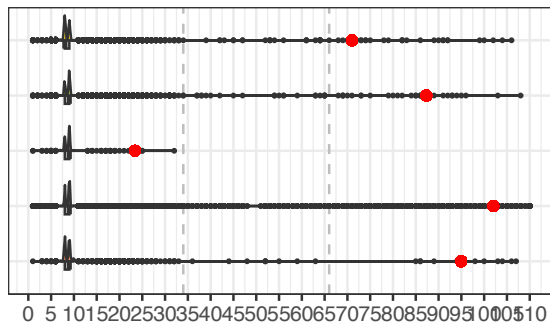

RFC1

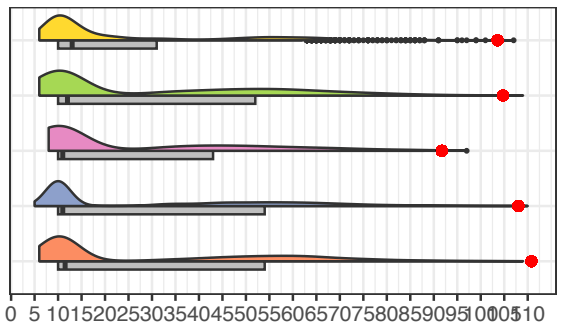

Repeat count
