# Supplementary material
Source: PubMed Central journal article supplement (PMC11249285)
Supplement: media-8.pdf [file media-8.pdf]

Population

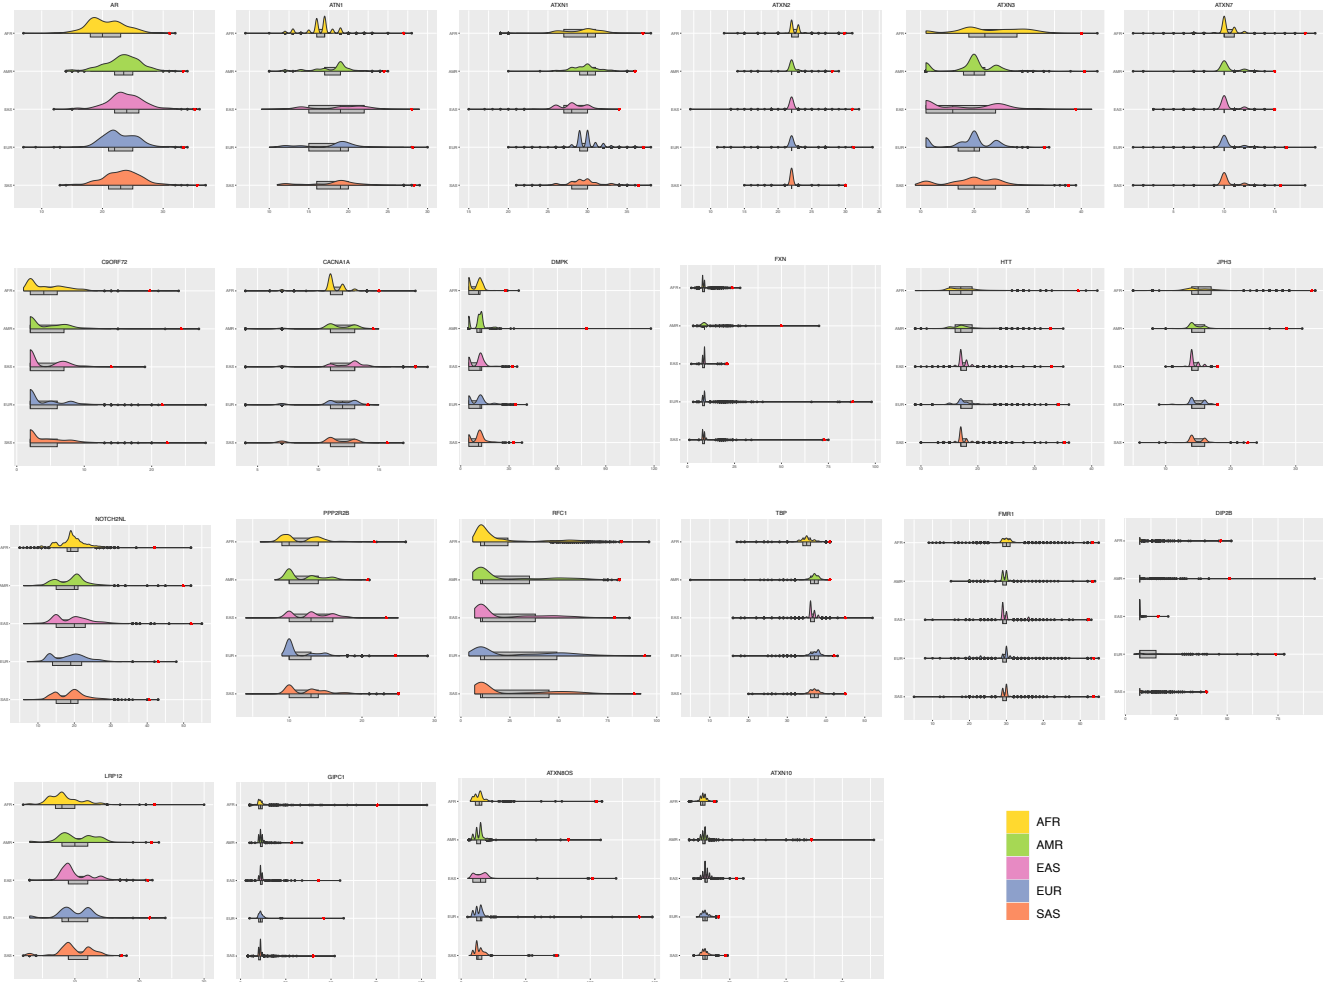

Repeat count
