# Supplementary material
Source: PubMed Central journal article supplement (PMC11249285)

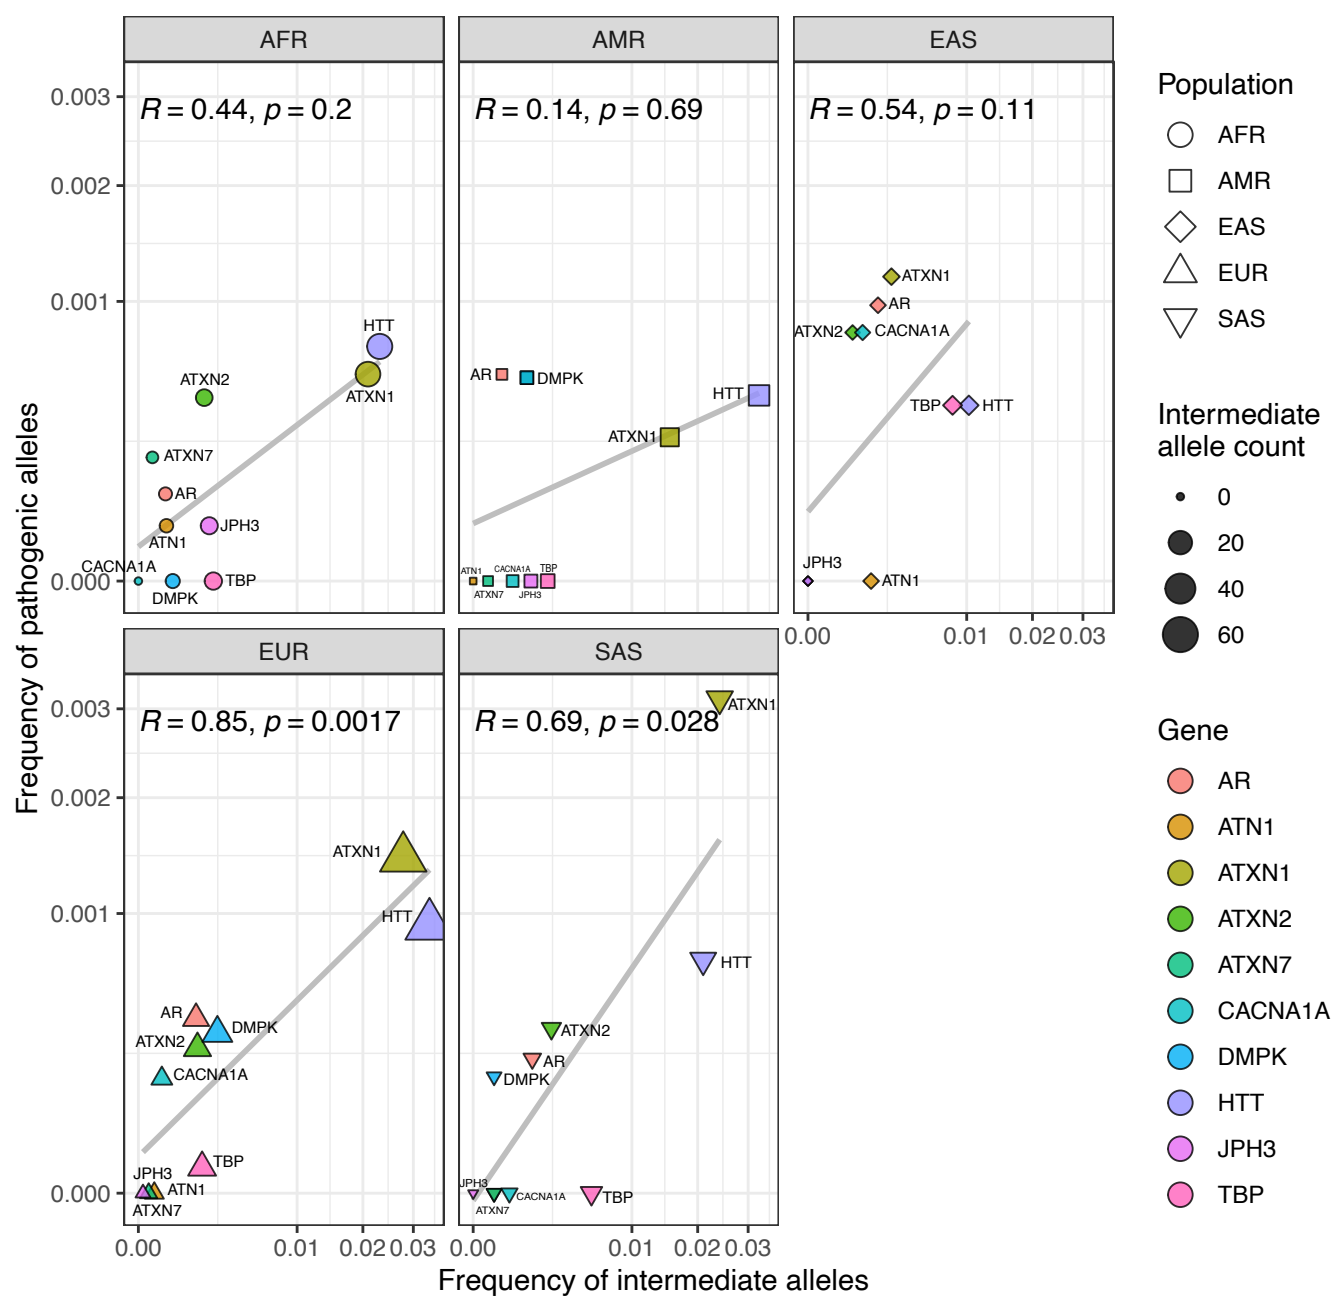

Supplement: media-9.pdf [file media-9.pdf]
